# Supplementary material for: Induction, Proliferation, Regeneration and Kinsenoside and Flavonoid Content Analysis of the Anoectochilus roxburghii (Wall.) Lindl Protocorm-like Body
Source: MDPI journal article supplement (doi:10.3390/plants11192465), 2022-09-21
Supplement: s1 [file s1]

## Supplementary material

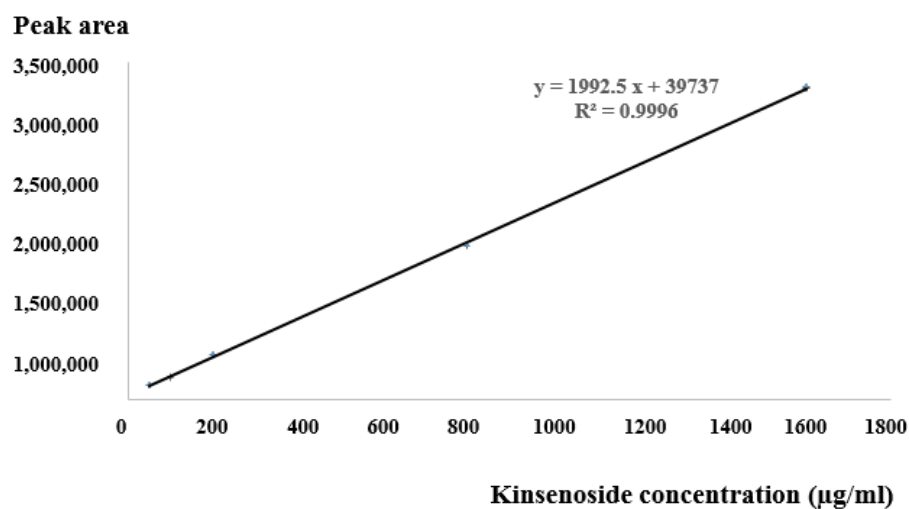

**Figure S1.** The linear regression equation of kinsenoside. Kinsenoside concentration is the x axis and the corresponding relative peak area is the y axis. The linear regression equation was  $y = 1992.5x + 39737$ , the correlation coefficient is 0.9996, and the linear range is 50–1600 µg/mL.

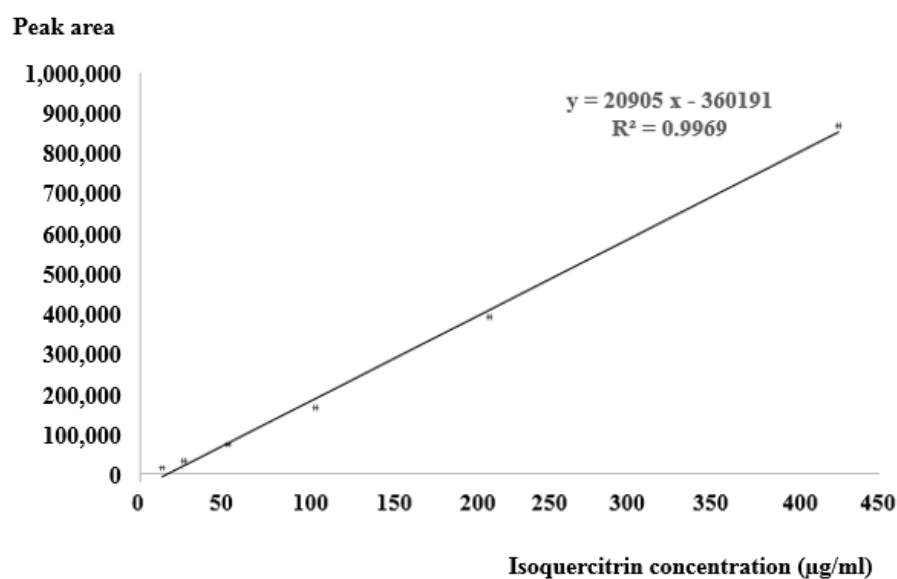

**Figure S2.** The linear regression equations of isoquercitrin. Its concentration is the x axis and the corresponding relative peak area is the y axis. The linear regression equations was  $y = 20905x - 360191$ , the correlation coefficients is 0.9969, and the linear range for the equation is 13.28–425 µg/mL.

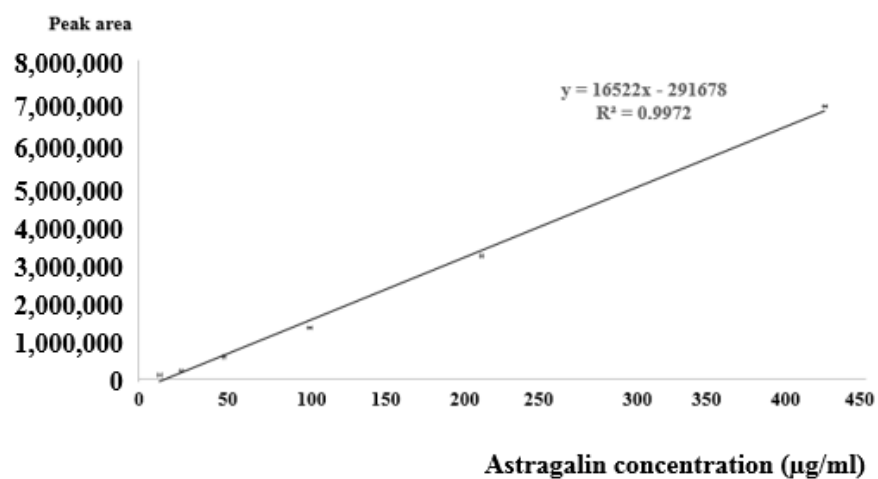

**Figure S3.** The linear regression equations of astragalin. Its concentration is the x axis and the corresponding relative peak area is the y axis. The linear regression equations was  $y = 16522x - 291678$ , the correlation coefficients is 0.9972, and the linear range for both equations is 13.28–425 µg/mL.
